# Supplementary material for: State Policy Strategies for the Workforce Emergency in Behavioral Health
Source: Atypon-hosted journal article supplement (doi:10.1176/appi.ps.20230617), 2024-09-17
Supplement: appi.ps.20230617.ds001.pdf [file appi.ps.20230617.ds001.pdf]

<https://psychiatryonline.org/doi/10.1176/appi.ps.20230617>

### **STRATEGY 1: Create a permanent workforce development structure.**

*Alaska* - Alaska Mental Health Trust Authority.

<https://alaskamentalthrust.org/alaska-mental-health-trust-authority/what-we-do/workforce-development/>

*California* - Behavioral Health Workforce Development Initiative (a structure within the California Department of Health Care Services). <https://www.workforce.buildingcalhhs.com/#>

*Connecticut* - Connecticut Workforce Collaborative on Behavioral Health.

[Hoge, M.A., Wolf, J., Migdole, S., Cannata, E., & Gregory, F. Workforce development and mental health transformation: a state perspective. Community Mental Health Journal, 52, 323–331, 2016. DOI 10.1007/s10597-015-9953-6](#)

*Florida* - Florida Center for Behavioral Health Workforce.

<https://www.flsenate.gov/Session/Bill/2024/330>

*Illinois* - Illinois Behavioral Health Workforce Center. <https://illinoisbhwc.org/>

Enabling legislation (Article 65): <https://www.ilga.gov/legislation/publicacts/102/PDF/102-0004.pdf>

*Maryland* - Office of Workforce Development, Behavioral Health Administration, Maryland Department of Health.

<https://health.maryland.gov/bha/Pages/Workforce-Development-and-Training.aspx>

*Maryland* - Maryland Commission to Study the Health Care Workforce Crisis.

<https://health.maryland.gov/Pages/Workforce-Commission.aspx>

*Minnesota* - Gearing Up for Action: Mental Health Workforce Plan for Minnesota, 2015.

<https://www.healthforceminnesota.org/assets/files/GearingUpForAction.pdf>

*Nebraska* - Behavioral Health Education Center of Nebraska (BHECN).

<https://www.unmc.edu/bhecn/>

*Ohio* - Child and Adolescent Behavioral Health Center of Excellence, 2021.

<https://mha.ohio.gov/supporting-providers/child-and-adolescent-bh-center-of-excellence>

*Oregon* - The Behavioral Health Workforce Initiative (a structure within the Oregon Health Authority).

<https://www.oregon.gov/oha/hsd/amh/pages/workforce-initiative.aspx>

### **STRATEGY 2: Develop a comprehensive behavioral health workforce plan.**

*Alaska* - Strengthening the System: Alaska's Comprehensive Integrated Mental Health Plan (Goal 9: Workforce, Data, and Funding), 2020-2024.

[https://health.alaska.gov/Commissioner/Documents/MentalHealth/StrengtheningSystem-CompPlan\\_Goal9\\_2020-24.pdf](https://health.alaska.gov/Commissioner/Documents/MentalHealth/StrengtheningSystem-CompPlan_Goal9_2020-24.pdf)

*California* - 2021 California Behavioral Health Workforce Assessment.

[https://www.workforce.buildingcalhhs.com/wp-content/uploads/2023/07/Behavioral-Health-Workforce-Full-Report\\_508.pdf](https://www.workforce.buildingcalhhs.com/wp-content/uploads/2023/07/Behavioral-Health-Workforce-Full-Report_508.pdf)

*Colorado* - Strengthening the Behavioral Health Workforce in Colorado: An Approach to Community Partnerships, 2022.

[https://bha.colorado.gov/sites/bha/files/documents/BHA\\_Workforce\\_Report\\_2022.pdf](https://bha.colorado.gov/sites/bha/files/documents/BHA_Workforce_Report_2022.pdf)

*Connecticut* - Strengthening the Behavioral Health Workforce for Children, Youth, and Families: A Strategic Plan for Connecticut. Farmington, CT, Child Health and Development Institute, November 2023. <https://www.chdi.org/index.php/publications/reports/other/strengthening-behavioral-health-workforce-children-youth-and-families-strategic-plan-connecticut>

*Hawaii* - Strengthening the People, Places, and Practices of Hawaii's Substance Abuse Prevention and Treatment Workforce: A Strategic Plan for Workforce Development, 2018.

<https://health.hawaii.gov/substance-abuse/files/2021/10/WFD-STRATEGIC-Plan-Doc-9.10.17-FINAL-APPROVED-3.2018.pdf>

*Idaho* - Idaho Behavioral Health Workforce Plan, 2022-2024.

<https://publicdocuments.dhw.idaho.gov/WebLink/DocView.aspx?id=22705&dbid=0&repo=PUBLIC-DOCUMENTS&cr=1>

*Nevada* - Behavioral Health Workforce Pipeline Development Plan (Goal 4), 2023.

<https://dph.nv.gov/uploadedFiles/dphnvgov/content/About/AdminSvcs/NV-Behavioral-Health-Workforce-Pipeline-Development-Plan.pdf>

*North Dakota* - North Dakota Plan for Behavioral Health (Aim 7), 2024.

[https://www.hsri.org/images/uploads/ACCESSIBLE\\_ND\\_January2024\\_Dashboard.pdf](https://www.hsri.org/images/uploads/ACCESSIBLE_ND_January2024_Dashboard.pdf)

*Washington State* - Washington State Behavioral Health Workforce Assessment, December 2017.

<https://www.wtb.wa.gov/wp-content/uploads/2019/05/WA-Behavioral-Health-Workforce-Assessment-2016-17.pdf>

*West Virginia* - West Virginia Behavioral Health Workforce Development Plan, 2020.

<https://www.wvhepc.edu/wp-content/uploads/2021/03/FINAL-PRODUCT-West-Virginia-Behavioral-Health-Workforce-Development-Plan-2020.pdf>

### **STRATEGY 3: Increase state funding of behavioral health services.**

*Connecticut* - Medicaid rate increases for behavioral health services to children, PA 23-204, Sec. 15 (approved 5/30/24, pg. 42). <https://www.cga.ct.gov/2024/ACT/PA/PDF/2024PA-00081-R00HB-05523-PA.PDF>

*Maine* - MaineCare Payment Reform, 2023.

<https://www.maine.gov/dhhs/blog/maine-dhhs-announces-historic-payment-reforms-behavioral-health-2023-01-11>

*Maryland* - Maryland Department of Health 2024 Provider Medicaid Rates for Community-Based Behavioral Health Services, 2024.

<https://health.maryland.gov/mmcp/Documents/Public%20Notice/FY24-Provider-Rate-Increases-01.01.24-Public-Notice%20%281%29.pdf#:~:text=Effective%20January%201%2C%202024%2C%20the%20reimbursement%20rates%20for,increase%20in%20total%20funds%20%28100%20percent%20general%20funds%29>

*Michigan* - Michigan Home and Community Based Services (HCBS) Spending Plan (Children's Behavioral Health Reform), 2021.

<https://incompassmi.org/wp-content/uploads/2021/08/MDHHS-HCBS-Spending-Plan-Initial-Submission.07122021.pdf>

*New Mexico* - Health and Human Services: Medicaid Reimbursement Update for LHHS, 2023.

<https://www.nmlegis.gov/handouts/LHHS%20071023%20Item%207%20Medicaid%20Reimbursement.pdf>

*North Carolina* - Investing in Behavioral Health and Resilience, 2023.

<https://www.ncdhhs.gov/investing-behavioral-health-and-resilience/download?attachment>

*Texas* - 88<sup>th</sup> Texas Legislature Regular Session Wrap Up, 2023. [https://mmhpi.org/wp-content/uploads/2023/07/MMHPI\\_88thLege\\_WrapUp.pdf](https://mmhpi.org/wp-content/uploads/2023/07/MMHPI_88thLege_WrapUp.pdf)

*Oregon* - Rate Year 2023 Coordinated Care Organization Program: Capitation Rate Development and Certification, 2022.

[https://www.oregon.gov/oha/HPA/ANALYTICS/OHPRates/Oregon-CY23-Rate-Certification\\_CCO-Rates.pdf?utm\\_medium=email&utm\\_source=govdelivery](https://www.oregon.gov/oha/HPA/ANALYTICS/OHPRates/Oregon-CY23-Rate-Certification_CCO-Rates.pdf?utm_medium=email&utm_source=govdelivery)

*Rhode Island* - HCBS Workforce Recruitment and Retention, 2021.

<https://eohhs.ri.gov/initiatives/hcbs-workforce-recruitment-and-retention/adult-behavioral-health-workforce>

#### **STRATEGY 4: Fund recruitment and retention grants and initiatives.**

*California* - Community-Based Organization Behavioral Health Workforce Grant Program, 2022.

<https://hcai.ca.gov/wp-content/uploads/2022/10/2022-23-CBO-BH-Workforce-Grant-Guide-Accessible-October.pdf>

*Indiana* - Behavioral Health Workforce Recruitment and Retention Innovation Grant Program, 2023.

<https://www.in.gov/fssa/dmha/files/WF-Innovation-RFF-Main-Doc.pdf>

*Maine* - Maine Department of Health and Human Services Bonuses for Direct Support Workers, 2022. <https://www.maine.gov/dhhs/blog/maine-dhhs-provides-additional-4-million-fund-bonuses-direct-support-workers-2022-03-14>

*Massachusetts* - Grant Funding to Support the Home- and Community-Based Services and Human Services Workforce, 2022. [https://www.mass.gov/info-details/grant-funding-to-support-the-home-and-community-based-services-and-human-services-workforce#who-can-apply?-](https://www.mass.gov/info-details/grant-funding-to-support-the-home-and-community-based-services-and-human-services-workforce#who-can-apply?)

*Michigan* - Michigan Home and Community Based Services (HCBS) Spending Plan (HCBS Workforce Development), 2021. <https://incompassmi.org/wp-content/uploads/2021/08/MDHHS-HCBS-Spending-Plan-Initial-Submission.07122021.pdf>

*Minnesota* - Fast Facts: 2023 Legislative Session, Behavioral Health Care: Improving Equity and Access, 2023. [https://mn.gov/dhs/assets/2023-08-Behavioral-health\\_tcm1053-586768.pdf](https://mn.gov/dhs/assets/2023-08-Behavioral-health_tcm1053-586768.pdf)

*New York* - Governor Hochul Announces Availability of \$21 Million in Federal Funding to Strengthen the State's Mental Health Workforce, 2021. <https://www.governor.ny.gov/news/governor-hochul-announces-availability-21-million-federal-funding-strengthen-states-mental>

*Oregon* - Behavioral Health Workforce Bonus and Housing Stipend Incentive Program, 2022. <https://www.oregon.gov/oha/HSD/AMH/Pages/Bonus-Stipend-Incentives.aspx>

#### **STRATEGY 5: Increase funding for training and education.**

*Colorado* - Colorado Proposed Spending Plan for Implementation of the American Rescue Plan Act of 2021, Section 9817 (Strengthen the Workforce and Enhance Rural Sustainability), 2021. <https://hcpf.colorado.gov/sites/hcpf/files/CO%20State%20Spending%20Plan%20for%20Implementing%20Section%209817%20of%20ARPA%2C%20June%202021.pdf>

*Maine* - Healthcare Training for ME, 2022. <https://www.maine.gov/healthcaretrainingforme/>

*Maryland* - Behavioral Health Administration's Online Training Portal, 2024. <https://bhatrainings.health.maryland.gov/>

*Massachusetts* - Behavioral Health Workforce Training Clearinghouse, 2024. <https://bhclearinghouse.org/>

*Michigan* - Michigan Home and Community Based Services (HCBS) Spending Plan (HCBS Workforce Development), 2021. <https://incompassmi.org/wp-content/uploads/2021/08/MDHHS-HCBS-Spending-Plan-Initial-Submission.07122021.pdf>

*Minnesota* - Fast Facts: 2022 Legislative Session, Behavioral Health: Building Capacity to Serve People in Crisis (establishing grants for mental health provider supervision), 2022. [https://mn.gov/dhs/assets/2022-07-behavioral-health\\_tcm1053-533272.pdf](https://mn.gov/dhs/assets/2022-07-behavioral-health_tcm1053-533272.pdf)

*Nebraska* - Behavioral Health Education Center of Nebraska, 2024.

<https://www.unmc.edu/bhecn/index.html>

*Ohio* - Child and Adolescent Behavioral Health Center of Excellence, 2021.

<https://mha.ohio.gov/supporting-providers/child-and-adolescent-bh-center-of-excellence>

*Oklahoma* - Strengthening Oklahoma's Pipeline of Behavioral Health Professionals, 2023.

[https://cdn.prod.website-files.com/638f97e13417b746d0eb3763/654a4c20161b3b6e04f81295\\_Strengthening%20Oklahoma%E2%80%99s%20pipeline%20of%20behavioral%20health%20professionals%20FINAL.pdf](https://cdn.prod.website-files.com/638f97e13417b746d0eb3763/654a4c20161b3b6e04f81295_Strengthening%20Oklahoma%E2%80%99s%20pipeline%20of%20behavioral%20health%20professionals%20FINAL.pdf)

*Texas* - 88<sup>th</sup> Texas Legislature Regular Session Wrap Up, 2023. [https://mmhpi.org/wp-content/uploads/2023/07/MMHPI\\_88thLege\\_WrapUp.pdf](https://mmhpi.org/wp-content/uploads/2023/07/MMHPI_88thLege_WrapUp.pdf)

*Washington* - Washington State Behavioral Health Workforce Development Initiative, 2024.

<https://waworkforcedevelopment.org/about-the-initiative-2/>

## **STRATEGY 6: Provide student loan repayment & tuition reimbursement.**

- ***Loan Repayment Programs - Expansion Announcements***

*Connecticut* - Governor Lamont announces launch of Connecticut Student Loan Repayment Program for health care providers in underserved areas and facilities (5/20/24).

<https://portal.ct.gov/dph/newsroom/press-releases---2024/state-loan-repayment-program#:~:text=Known%20as%20the%20Connecticut%20Student,for%20at%20least%20two%20years>

*Massachusetts* - Budget Summary, FY2024 Enacted – Behavioral Health Workforce Supports.

<https://budget.digital.mass.gov/summary/fy24/enacted/health-and-human-services/health-and-human-services/40000054/>

*Michigan* - Michigan State Loan Repayment Program Overview, 2024.

<https://www.michigan.gov/mdhhs/doing-business/providers/slrp/michigan-state-loan-repayment-program-overview>

*New Jersey* - ICYMI: Murphy administration expands capacity of New Jersey's behavioral healthcare workforce through student loan repayment incentive (1/24/23).

<https://www.nj.gov/governor/news/news/562023/20230124b.shtml>

*New York* - Governor Hochul announces \$5 million to expand loan repayment for mental health workers (11/8/23).

<https://www.governor.ny.gov/news/governor-hochul-announces-5-million-expand-loan-repayment-program-mental-health-workers>

- ***Loan Repayment Programs – By State***

*HRSA National Health Service Corps* - State Loan Repayment Program Contacts.  
<https://nhsc.hrsa.gov/loan-repayment/state-loan-repayment-program/contacts>

*Alabama* - Office of Primary Care and Rural Health.  
<https://www.alabamapublichealth.gov/ruralhealth/nhsc.html>

*Alaska* - Strengthening Healthcare Access Recruitment Program (SHARP).  
<https://health.alaska.gov/dph/Emergency/Pages/healthcare/sharp/default.aspx>

*Arizona* - Arizona State Loan Repayment Program. <https://www.azdhs.gov/prevention/health-systems-development/workforce-programs/loan-repayment/index.php#loan-repayment-application-apply>

*Arkansas* - Loans, Scholarships, Schools, & Jobs.  
<https://www.healthy.arkansas.gov/programs-services/topics/loans-scholarships-schools-jobs>

*California* - California State Loan Repayment Program. <https://hcai.ca.gov/workforce/financial-assistance/loan-repayment/slrp/>

*California* - Licensed Mental Health Services Provider Education Program.  
<https://hcai.ca.gov/workforce/financial-assistance/loan-repayment/lmhspep/>

*Colorado* - Colorado Health Service Corps.  
<https://cdphe.colorado.gov/colorado-health-service-corps>

*Connecticut* - Connecticut Student Loan Repayment Program.  
<https://www.ctslrp.org/>

*Delaware* - Delaware Health Care Provider Loan Repayment Program.  
<https://dhss.delaware.gov/dhcc/loanrepaymentnew.html>

*Florida* - Florida Reimbursement Assistance for Medical Education (FRAME).  
<https://www.floridahealth.gov/provider-and-partner-resources/community-health-workers/HealthResourcesandAccess/FRAMEProgram/index.html>

*Georgia* - Loan Repayment Programs.  
<https://healthcareworkforce.georgia.gov/loan-repayment-scholarship-programs/loan-repayment-programs>

*Guam* - Guam Loan Repayment Program.  
<https://gbhwc.guam.gov/department-information/guam-loan-repayment-program>

*Hawaii* - The Hawaii State Loan Repayment Program.  
<https://www.ahec.hawaii.edu/hslrp/>

*Idaho* - Loan Repayment and Grants.

<https://healthandwelfare.idaho.gov/providers/rural-health-and-underserved-areas/loan-repayment-and-grants>

*Illinois* - Community Behavioral Health Care Professional Loan Repayment Program.  
<https://www.isac.org/CommunityBehavioralHealth#Program%20Description>

*Indiana* - Indiana State Loan Repayment Program.  
<https://www.in.gov/health/cdpc/state-loan-repayment-program/>

*Iowa* - Mental Health Professional Loan Repayment Program. <https://educate.iowa.gov/highered/financial-aid/loan-repayment/mental-health-professional-loan-repayment-program>

*Kansas* - Kansas State Loan Repayment Program.  
<https://www.kdhe.ks.gov/296/State-Loan-Repayment-Program>

*Kentucky* - Kentucky State Loan Repayment Program.  
<https://medicine.uky.edu/centers/ruralhealth/state-loan-repayment-program>

*Louisiana* - Louisiana State Loan Repayment Program.  
<https://wellaheadla.com/healthcare-access/louisiana-primary-care-office/state-loan-repayment-program/>

*Maine* - Maine Health Care Provider Loan Repayment Pilot Program.  
<https://www.famemaine.com/affording-education/pay-for-school/repaying-student-loans/maine-health-care-provider-loan-repayment-pilot-program/>

*Maryland* - State Loan Repayment Program and Maryland Loan Assistance Repayment Program for Physicians.  
[https://mhec.maryland.gov/preparing/Pages/FinancialAid/ProgramDescriptions/prog\\_mlarp.aspx](https://mhec.maryland.gov/preparing/Pages/FinancialAid/ProgramDescriptions/prog_mlarp.aspx)

*Maryland* - Maryland Loan Repayment Programs.  
<https://health.maryland.gov/pophealth/Pages/State-Loan-Repayment-Program.aspx>

*Massachusetts* - Massachusetts Loan Repayment Program for Health Professionals.  
<https://www.mass.gov/info-details/massachusetts-loan-repayment-program-mlrp-for-health-professionals>

*Michigan* - MDHHS Behavioral Health Loan Repayment Program.  
[https://www.michigan.gov/mdhhs/doing-business/providers/behavioral-health-loan-repayment-program?utm\\_campaign=&utm\\_medium=email&utm\\_source=govdelivery](https://www.michigan.gov/mdhhs/doing-business/providers/behavioral-health-loan-repayment-program?utm_campaign=&utm_medium=email&utm_source=govdelivery)

*Minnesota* - Minnesota Rural Mental Health Professional Loan Forgiveness Guidelines.  
<https://www.health.state.mn.us/facilities/ruralhealth/funding/loans/ruralmental.html>

*Mississippi* - State Loan Repayment Program.  
<https://msdh.ms.gov/page/44,25630,111,304.html#eligibility>

*Missouri* - Health Professional Loan and Loan Repayment Programs.

<https://health.mo.gov/living/families/primarycare/hpl-lr/index.php>

*Montana* - Montana State Loan Repayment Program.

<https://dphhs.mt.gov/ecfsd/primarycare/slrp>

*Nebraska* - Nebraska Loan Repayment.

<https://gis.ne.gov/portal/apps/experiencebuilder/experience/?id=e3bbcc604b72448582d83843cf7eb494>

*Nevada* - Nevada Health Service Corps.

<https://med.unr.edu/statewide/programs/nevada-state-office-of-rural-health/nevada-health-service-corps>

*New Hampshire* - State Loan Repayment Program.

<https://www.dhhs.nh.gov/programs-services/health-care/rural-health-primary-care/state-loan-repayment-program-slrp>

*New Jersey* - Behavioral Healthcare Provider Loan Redemption Program.

<https://www.hesaa.org/Pages/BHLRP.aspx>

*New Mexico* - Health Professional Loan Repayment Program.

<https://hed.nm.gov/financial-aid/loan-repayment-programs/health-professional>

*New York* - OMH Community Mental Health Loan Repayment Program.

<https://omh.ny.gov/omhweb/rfp/2023/cmhlrp/round-three/index.html>

*North Carolina* - State Loan Repayment Program.

<https://www.ncdhhs.gov/divisions/office-rural-health/state-loan-repayment-program>

*North Dakota* - ND Healthcare Professional Loan Repayment Program.

<https://www.hhs.nd.gov/health/primary-care-office/north-dakota-health-service-corps/healthcare-professional-loan-repayment>

*Ohio* - Workforce Programs.

<https://odh.ohio.gov/know-our-programs/primary-care-office/workforce-programs>

*Oklahoma* - Oklahoma Health Corps Loan Repayment Program.

[https://oklahoma.gov/health/health-education/community-outreach/community-development-services/ok-health-corps.html#:~:text=The%20Oklahoma%20Health%20Corps%20\(OK,a%20two%2Dyear%20service%20commitment](https://oklahoma.gov/health/health-education/community-outreach/community-development-services/ok-health-corps.html#:~:text=The%20Oklahoma%20Health%20Corps%20(OK,a%20two%2Dyear%20service%20commitment)

*Oregon* - Oregon Behavioral Health Loan Repayment Program.

<https://www.oregon.gov/oha/hsd/amh/pages/loan-repayment.aspx>

*Pennsylvania* - Pennsylvania Primary Care Loan Repayment Program.

<https://www.health.pa.gov/topics/programs/Primary%20Care/Pages/Loan-Repayment.aspx>

*Rhode Island* - Health Professional Loan Repayment Program.

[https://health.ri.gov/programs/detail.php?pgm\\_id=179](https://health.ri.gov/programs/detail.php?pgm_id=179)

*South Carolina* - Recruitment & Retention Programs.

<https://www.scahec.net/recruitment.html>

*South Dakota* - State Loan Repayment Program.

<https://doh.sd.gov/healthcare-professionals/rural-health/careers-and-recruiting/recruitment-assistance/slrp/>

*Tennessee* - Tennessee State Loan Repayment Program.

<https://www.tn.gov/health/health-program-areas/division-of-health-disparities-elimination-/rural-health/tslrp.html>

*Texas* - State Loan Repayment Program.

<https://www.hhloans.com/index.cfm?objectid=46391700-C9BA-11ED-B7870050560100A9>

*Utah* - Loan Repayment Programs.

<https://auch.org/community-health-centers/item/1093-loan-repayment-programs#:~:text=The%20Behavioral%20Health%20Workforce%20Loan,10%25%20of%20the%20award%20amount>

*Vermont* - Loan Repayment & Scholarships.

<https://www.healthvermont.gov/systems/health-professionals/loan-repayment-scholarships>

*Virginia* - Virginia Behavioral Health Student Loan Repayment Program.

<https://www.vdh.virginia.gov/health-equity/virginia-behavioral-health-student-loan-repayment-program/>

*Washington* - Washington Health Corps.

<https://wsac.wa.gov/washington-health-corps>

*Washington DC* - DC Health Professional Loan Repayment Program.

<https://dchealth.dc.gov/service/dc-health-professional-loan-repayment-program-hplr>

*West Virginia* - Mental Health Loan Repayment Program.

<https://www.collegeforwv.com/programs/mental-health-loan-repayment-program/>

*Wisconsin* - Education Loan Repayment.

<https://worh.org/resources/for-the-workforce/loan-repayment/#data1f91-8d71a69b-a0e3>

*Wyoming* - Health Workforce Development.

<https://health.wyo.gov/publichealth/rural/officeofruralhealth/primary-care-office/>

- ***Tuition Reimbursement***

*Colorado* - Behavioral Health Incentive.

<https://cdhe.colorado.gov/students/behavioral-health-incentive>

*Connecticut* - CT Health Horizons.

<https://www.ct.edu/cthealth>

*Pennsylvania* - Behavioral Health Higher Education Plan (BHHEP).

<https://bharp.org/providers/bhhep/>

## **STRATEGY 7: Expand the direct support, peer support, and family workforce.**

- ***Direct Care Staff***

*California* - Workforce for a Healthy California.

<https://www.chhs.ca.gov/workforce4healthyca/>

*Maine* - Maine DHHS provides an additional \$4 million to fund bonuses for direct support workers (3/14/22).

<https://www.maine.gov/dhhs/blog/maine-dhhs-provides-additional-4-million-fund-bonuses-direct-support-workers-2022-03-14>

*Massachusetts* - Healey-Driscoll administration awards \$16.3 million in workforce competitiveness trust fund grants to address the demand for health care and behavioral health workers (2/23/24).

<https://www.mass.gov/news/healey-driscoll-administration-awards-163-million-in-workforce-competitiveness-trust-fund-grants-to-address-the-demand-for-health-care-and-behavioral-health-workers>

*Minnesota* - HCBS Workforce Development Grant.

<https://mn.gov/dhs/partners-and-providers/news-initiatives-reports-workgroups/long-term-services-and-supports/workforce/grants.jsp>

*Minnesota* - The Direct Care Workforce Shortage in Minnesota.

<https://mn.gov/dhs/partners-and-providers/news-initiatives-reports-workgroups/long-term-services-and-supports/workforce/>

*North Carolina* - Investing in North Carolina's Caregiving Workforce.

<https://www.ncdhhs.gov/investing-north-carolinas-caregiving-workforce-recommendations-strengthen-north-carolinas-nursing/download?attachment>

- ***Peer Support***

*California* - Peer Workforce Investment (PWI).

<https://www.workforce.buildingcalhhs.com/grant-programs/peer-workforce-investment-grant/>

*California* - Peer Certification.

<https://www.calmhsa.org/peer-certification/>

*California* - Peer Personnel Training and Placement.

<https://hcai.ca.gov/workforce/financial-assistance/grants/bhp/#peer-personnel-training-and-placement>

*Colorado* - Peer Support Specialists.

<https://bha.colorado.gov/peer-support-specialists>

*Connecticut* - Office of Recovery and Community Affairs / Peer Recovery Support Certification.

<https://portal.ct.gov/dmhas/newsworthy/news-items/connecticut-peer-recovery-support-certification-process>

*Indiana* - Indiana Certified Peer Support Professionals.

<https://www.in.gov/fssa/dmha/office-of-consumer-and-family-affairs/peer-support/>

*Maine* - Intentional Peer Support.

<https://www.maine.gov/dhhs/obh/training-certification/intentional-peer-support>

*Massachusetts* - DMH Peer Support Training and Certification Program.

<https://www.mass.gov/info-details/dmh-peer-support-training-and-certification-program>

*Montana* - Montana's Peer Network.

<https://mtpeernetwork.org/>

*New York* - Governor Hochul expands services for individuals with complex mental health needs in Monroe County (3/20/24).

<https://www.governor.ny.gov/news/governor-hochul-expands-services-individuals-complex-mental-health-needs-monroe-county>

*North Carolina* - NC launches additional phone support for people experiencing mental illness or substance use disorder (2/19/24).

<https://www.ncdhhs.gov/news/press-releases/2024/02/19/nc-launches-additional-phone-support-people-experiencing-mental-illness-or-substance-use-disorder>

*Ohio* - Ohio expands peer support certifications to help people in recovery from mental illness and substance use disorders (5/10/22).

<https://mha.ohio.gov/about-us/media-center/news/pr-5-10-2022>

*Oklahoma* - Peer Recovery Support Specialist.

<https://oklahoma.gov/odmhsas/recovery/prss.html>

*Pennsylvania* - Peer Support Training.

<https://www.pa.gov/en/agencies/dhs/resources/mental-health-substance-use-disorder/peer-support-training.html>

*Washington* - Peer Support.

<https://www.hca.wa.gov/billers-providers-partners/program-information-providers/peer-support>

*Wisconsin* - Peer Services.

<https://www.dhs.wisconsin.gov/peer-services/index.htm>

- ***Family Advocacy***

*Idaho* - Youth Empowerment Services / Workforce Development and Training Plan (May 1, 2017; Goal 3, pg. 27).

<https://yes.idaho.gov/wp-content/uploads/2021/04/WFDandTrainingPlan5-1-17.pdf>

*Montana* - For Parents & Caregivers (scroll halfway down the page).

<https://mtpeernetwork.org/>

*New York* - Statewide Structure and Network for Family Support and Advocacy.

<https://omh.ny.gov/omhweb/rfp/2023/ssnfsa/index.html>

## **CROSS-CUTTING STRATEGY: Workforce Diversity**

*California* - The California Peer Workforce Investment grants emphasize recruitment and training of peer staff who are bilingual and/or BIPOC.

<https://workforce.buildingcalhhs.com/grant-programs/peer-workforce-investment-grant/>

*California* - California awards \$23 million to support behavioral health care workforce (6/27/23).

<https://www.dhcs.ca.gov/formsandpubs/publications/oc/Documents/2023/23-28-BHRR-6-27-23.pdf>

*Connecticut* - The CT Health Horizons tuition assistance program prioritizes awards to bilingual students and students of color.

<https://www.ct.edu/cthealth>

*Colorado* - Legislatively mandated behavioral health-care provider workforce plan was required to focus on workforce diversity (September 2022).

[https://bha.colorado.gov/sites/bha/files/documents/BHA\\_Workforce\\_Report\\_2022.pdf](https://bha.colorado.gov/sites/bha/files/documents/BHA_Workforce_Report_2022.pdf)

*Maine* - DHHS advances health care workforce development strategy (4/7/23).

<https://www.maine.gov/dhhs/blog/dhhs-advances-health-care-workforce-development-strategy-2023-04-07>

*Nebraska* - Behavioral Health Education Center of Nebraska has three extension sites to develop, train, and support a workforce in the culturally diverse rural areas of the state.

<https://www.unmc.edu/bhecn/>

*Nevada* - Public Health Workforce Pipeline Development Plan (2023).

<https://dph.nv.gov/uploadedFiles/dphnvgov/content/About/AdminSvcs/Public-Health-Workforce-Pipeline-Plan.pdf>

*Oregon* - Allocated \$60 million specifically to develop a diverse behavioral health workforce, with ‘diversity’ defined as people of color, tribal members, and rural residents.

[www.oregon.gov/oha/HSD/AMH/Pages/Workforce-Initiative.aspx](http://www.oregon.gov/oha/HSD/AMH/Pages/Workforce-Initiative.aspx)

*Tennessee* - TDMHSAS TennCare publish public behavioral health workforce report (December 2021).

<https://www.tn.gov/behavioral-health/news/2021/12/9/tdmhsas-tenncare-publish-public-behavioral-health-workforce-report.html>

*Texas* - Texas Statewide Behavioral Health Strategic Report (Fiscal Year 2023).

<https://www.hhs.texas.gov/sites/default/files/documents/texas-statewide-behavioral-health-strategic-plan-progress-report-dec-2023.pdf>
